# Supplementary material for: Combination Therapy with a Bispecific Antibody Targeting the hERG1/β1 Integrin Complex and Gemcitabine in Pancreatic Ductal Adenocarcinoma
Source: MDPI journal article supplement (doi:10.3390/cancers15072013), 2023-03-28
Supplement: s1 [file s1]

## Supplementary information

PANC-1

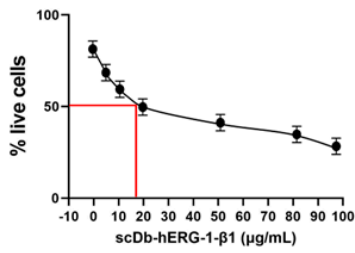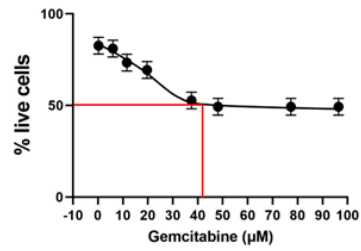

Mia Paca-2

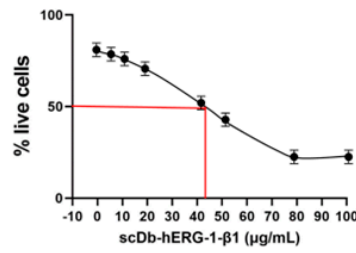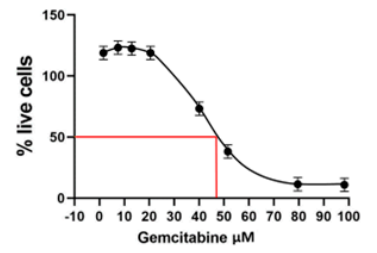

BxPC3

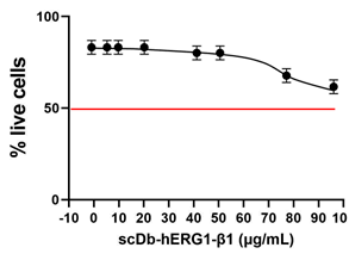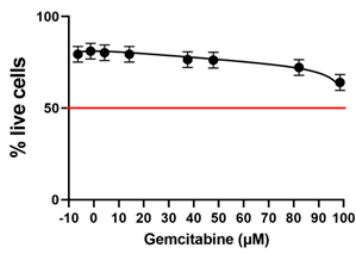

RLT-PSC

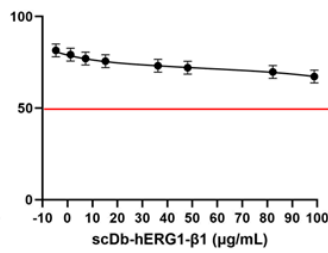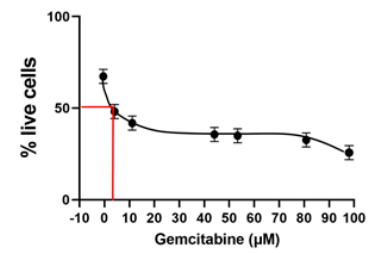

Figure S1: Dose-dependence curves of PANC-1, Mia-Paca2, BxPC3, RLT-PSC treated with different concentrations of scDb-hERG1-β1 and Gemcitabine for 24 hours. The intercept between the black curve and the red line indicates the IC50 value.

|                                               | Control | Gemcitabine<br>25mg/Kg | Gemcitabine<br>5mg/Kg | scDb-<br>hERG1- $\beta$ 1 | Mean survival<br>time (Days) |
|-----------------------------------------------|---------|------------------------|-----------------------|---------------------------|------------------------------|
| Control                                       | -       |                        |                       |                           | 67                           |
| Gemcitabine 25mg/Kg                           | 0.83    | -                      | -                     | -                         | 77                           |
| Gemcitabine 5mg/Kg                            | 0.22    | <b>0.02</b>            | -                     | -                         | 59                           |
| scDb-hERG1- $\beta$ 1                         | 0.10    | 0.44                   | <b>0.05</b>           | -                         | 79                           |
| scDb-hERG1- $\beta$ 1 +<br>Gemcitabine 5mg/Kg | 0.33    | 0.81                   | 0.10                  | 0.71                      | 82                           |

*Table S1: Pairwise comparison for Kaplan-Meier survival curve. The  $p$  values calculated with Long-Rank test are reported. The last column show mean survival time of all the treatment groups.*

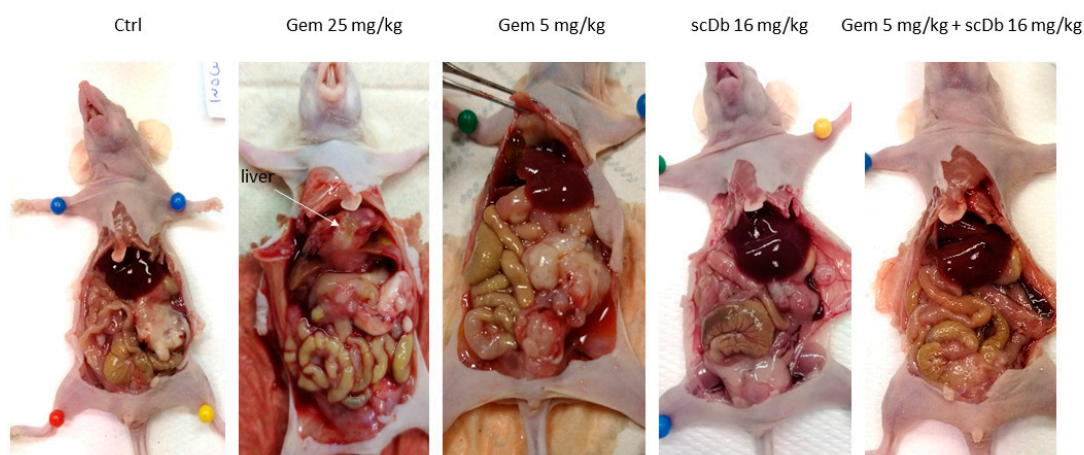

*Figure S2: Abdominal gross view at the end-point (the day of euthanasia) showed abnormal liver in mice treated with Gemcitabine at the dose of 25 mg/kg, while in the other groups of treatment no abnormalities were observed.*

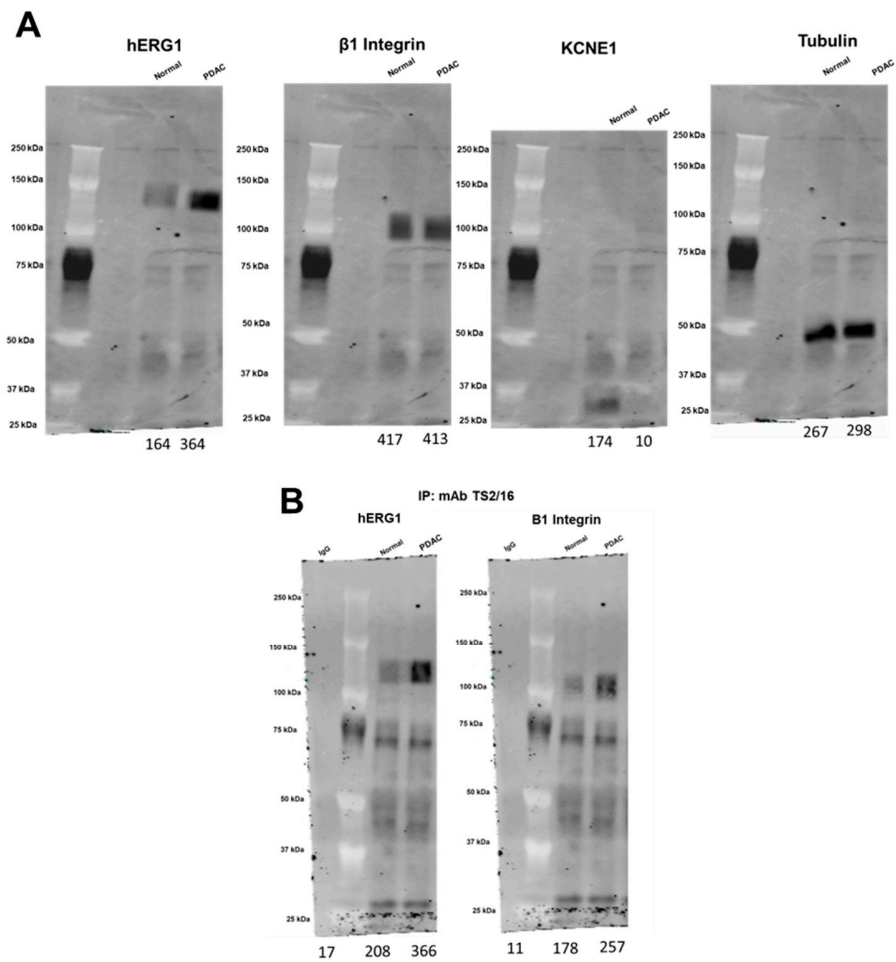

*Figure S3: Whole blots of figure 1C (A) and figure 1D (B) with densitometry readings/intensity ratio of each band.*
